# Supplementary material for: Synthesis of Block Copolymer Brush by RAFT and Click Chemistry and Its Self-Assembly as a Thin Film
Source: MDPI journal article supplement (doi:10.3390/molecules25204774), 2020-10-17

## Synthesis of block copolymer brush by RAFT and click chemistry and its self-assembly as a thin film

Hajeeth Thankappan, Mona Semsarilar, Suming Li, Antoine Venault, Yung Chang, Denis Bouyer and Damien Quemener \*

Figure S1. Disappearance of the RAFT end group signal as evidenced by  $H^1$  NMR

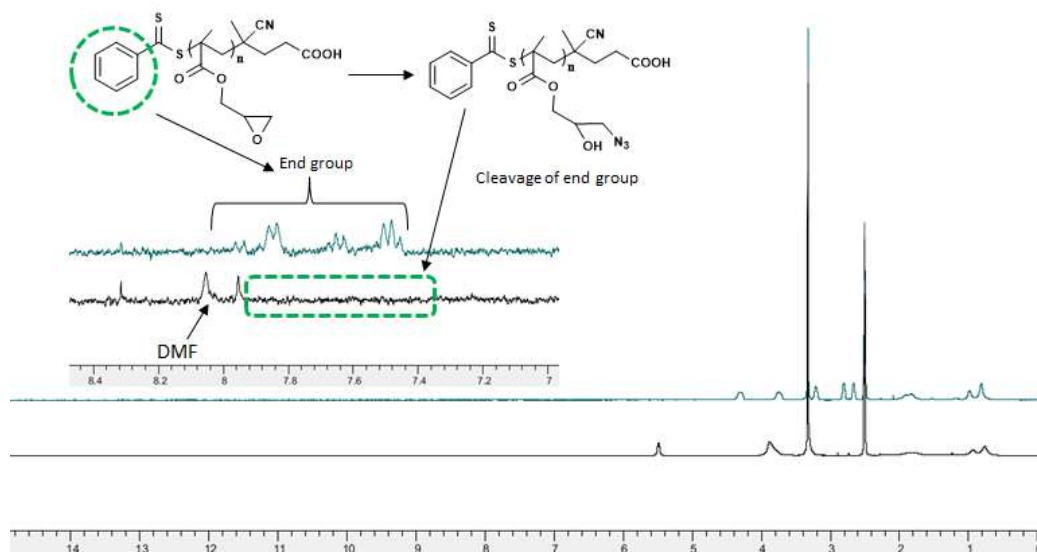

Supplement: s1 [file s1]
